# Supplementary material for: Robust urethane-bridged silica aerogels available for water-carved aerosculptures
Source: Royal Society of Chemistry journal article supplement (doi:10.1039/c6nj03414d), 2017-01-01
Supplement: c6nj03414d1.pdf [file c6nj03414d1.pdf]

**Electronic Supplementary Information (ESI)**

**Robust Urethane-Bridged Silica Aerogels Available for Water-Carved  
Aerosculptures**

Yulu Zhang<sup>†</sup>, Jin Wang<sup>†</sup>, Yong Wei and Xuetong Zhang\*

Suzhou Institute of Nano-Tech and Nano-Bionics (SINANO), Chinese Academy of Sciences, Suzhou,  
215123, P. R. China

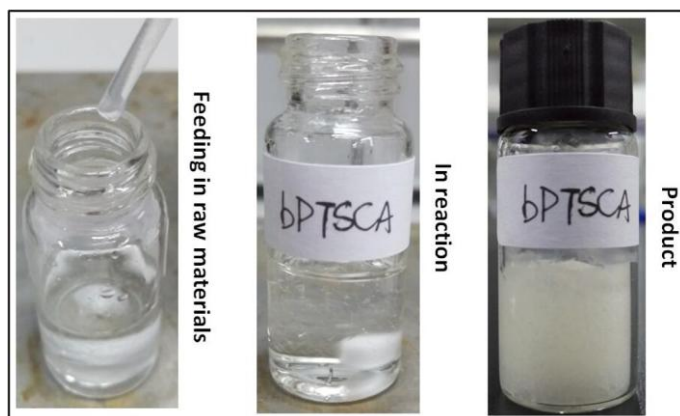

Fig. S1 Synthesis process of bPTSCA

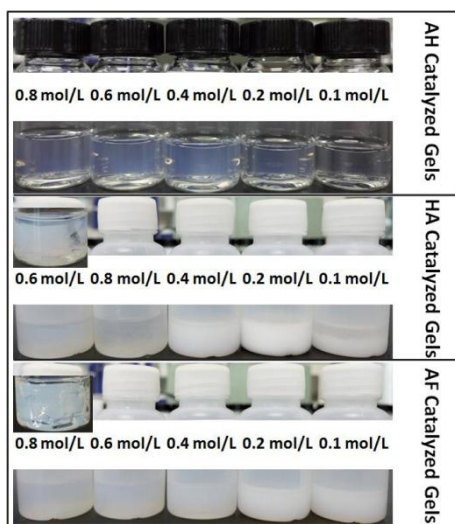

Fig. S2 Gels catalyzed by different catalysts. The insets were the corresponding gels (prepared in sealed glass bottles) with syneresis and crack after aging for some time

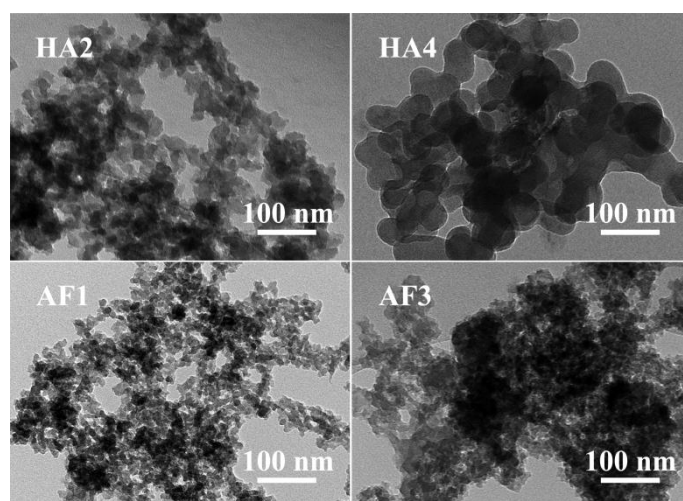

Fig. S3 TEM images of urethane-bridged silica aerogels of HA2, HA4, AF1 and AF3

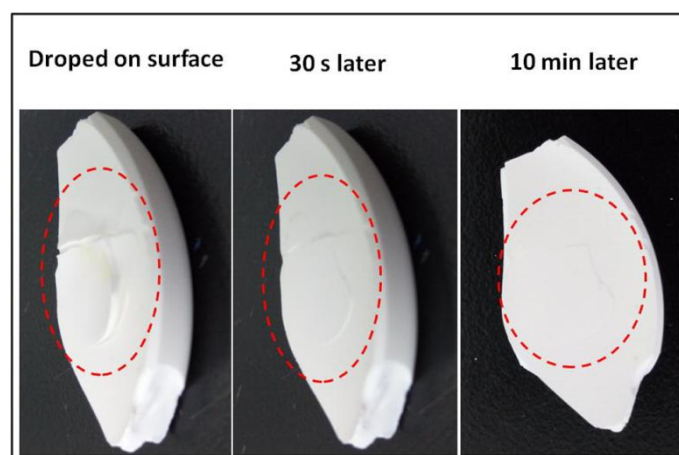

Fig. S4 Invalid carving on urethane-bridged silica aerogel by hexane
